# Supplementary material for: Avelumab as second-line therapy for metastatic, platinum-treated urothelial carcinoma in the phase Ib JAVELIN Solid Tumor study: 2-year updated efficacy and safety analysis
Source: HighWire-hosted journal article supplement (doi:10.1136/jitc-2020-001246), 2020-10-01
Supplement: jitc-2020-001246supp002_data_supplement.pdf [file jitc-2020-001246supp002_data_supplement.pdf]

## Additional file 2. Response per RECIST 1.1 Adjudicated by Independent Review Committee

|                                               |                  |
|-----------------------------------------------|------------------|
|                                               | N=242            |
| Confirmed BOR, n (%)                          |                  |
| Complete response                             | 10 (4.1)         |
| Partial response                              | 30 (12.4)        |
| Stable disease                                | 65 (26.9)        |
| Non-complete response/non-progressive disease | 1 (0.4)          |
| Progressive disease                           | 93 (38.4)        |
| Nonevaluable <sup>a</sup>                     | 43 (17.8)        |
| Confirmed ORR (95% CI), %                     | 16.5 (12.1-21.8) |
| DCR, % <sup>b</sup>                           | 43.8             |

BOR, best overall response; DCR, disease control rate; ORR, objective response rate; RECIST 1.1, Response Evaluation Criteria in Solid Tumors version 1.1.

<sup>a</sup> Missing and/or not-assessable information: 35 patients had no postbaseline tumor assessment, two patients had postbaseline assessments but response was not evaluable, five patients had stable disease of insufficient duration (<6 weeks after start date without further evaluable tumor assessment), and one patient was nonevaluable and had progressive disease >12 weeks after study assessment.

<sup>b</sup> Proportion of patients with a best overall response of complete response, partial response, stable disease, and non-complete response/non-progressive disease.
