# Supplementary material for: Avelumab as second-line therapy for metastatic, platinum-treated urothelial carcinoma in the phase Ib JAVELIN Solid Tumor study: 2-year updated efficacy and safety analysis
Source: HighWire-hosted journal article supplement (doi:10.1136/jitc-2020-001246), 2020-10-01

**Additional file 3. Treatment Response in Post-Platinum Patients.** (A) Time to and duration of response in responding patients (n=40). (B) Best change in target lesions from baseline in all patients, including classification of patients based on programmed cell death 1 ligand 1 (PD-L1) status and site of baseline metastases (n=198). SD, stable disease.

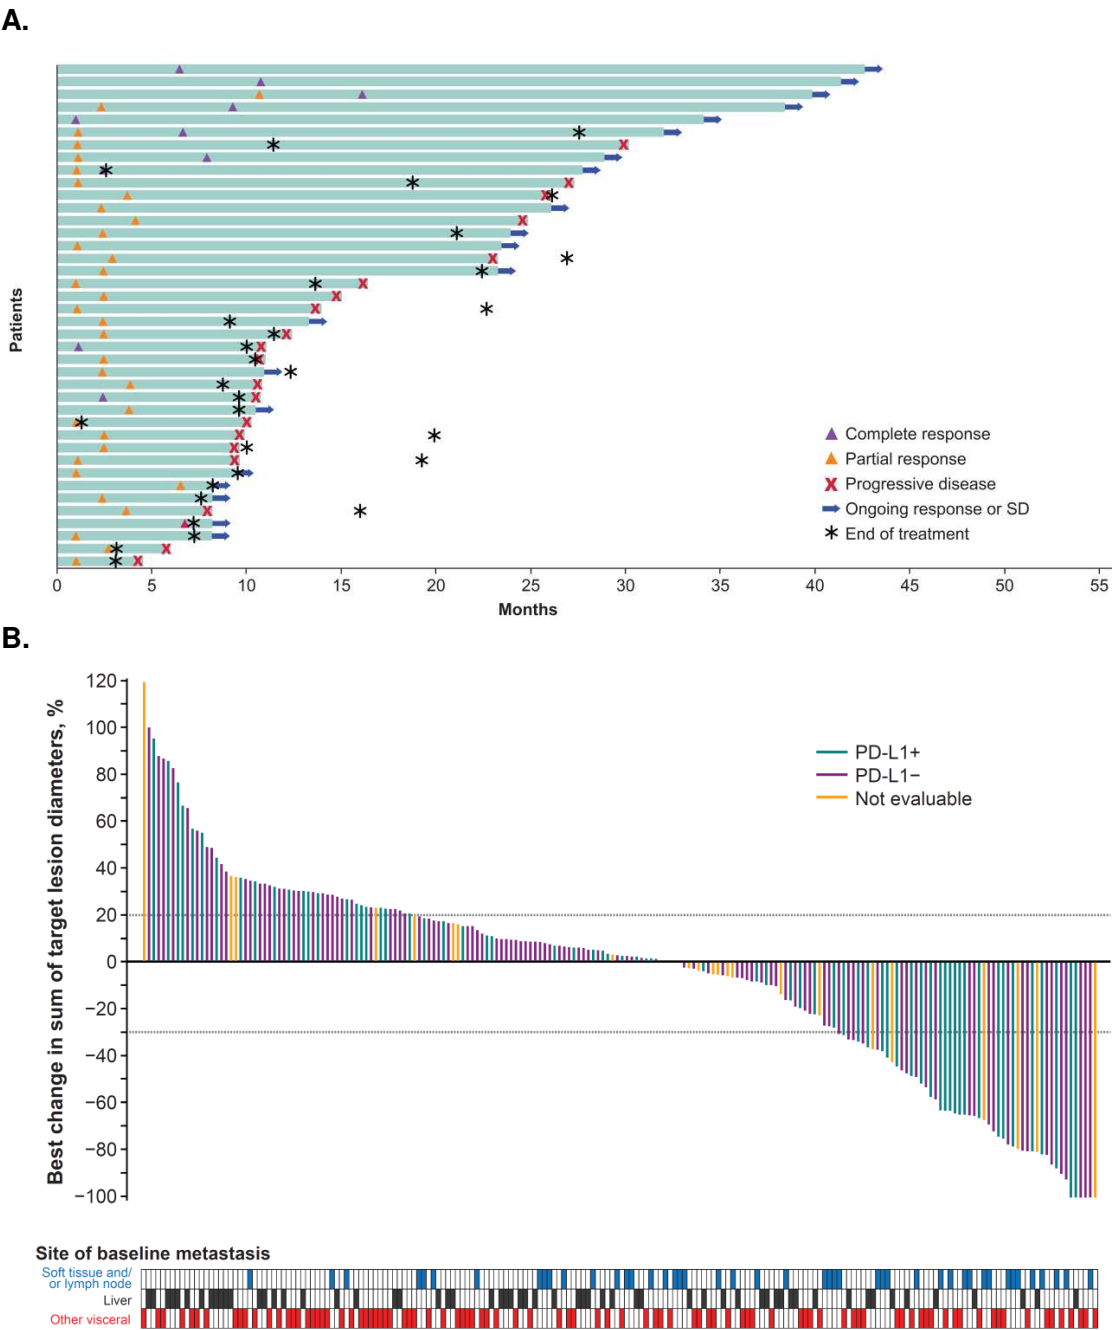

Supplement: jitc-2020-001246supp003_data_supplement.pdf [file jitc-2020-001246supp003_data_supplement.pdf]
