# Supplementary material for: Avelumab as second-line therapy for metastatic, platinum-treated urothelial carcinoma in the phase Ib JAVELIN Solid Tumor study: 2-year updated efficacy and safety analysis
Source: HighWire-hosted journal article supplement (doi:10.1136/jitc-2020-001246), 2020-10-01
Supplement: jitc-2020-001246supp004_data_supplement.pdf [file jitc-2020-001246supp004_data_supplement.pdf]

**Additional file 4. Efficacy in Evaluable Patients by PD-L1 Expression Status (cutoff: expression in  $\geq 5\%$  of tumor cells; N=214)**

|                                    | <b>PD-L1+<br/>(n=84)</b> | <b>PD-L1-<br/>(n=130)</b> |
|------------------------------------|--------------------------|---------------------------|
| <b>Confirmed ORR (95% CI), %</b>   | 23.8 (15.2-34.3)         | 12.3 (7.2-19.2)           |
| <b>Median PFS (95% CI), months</b> | 2.2 (1.4-4.11)           | 1.5 (1.4-2.4)             |
| 3-month PFS rate (95% CI), %       | 34.0 (25.8-42.4)         | 43.4 (32.3-53.9)          |
| 6-month PFS rate (95% CI), %       | 22.6 (15.5-30.5)         | 35.1 (24.7-45.7)          |
| 12-month PFS rate (95% CI), %      | 14.6 (8.8-21.9)          | 23.9 (14.2-35.0)          |
| <b>Median OS (95% CI), months</b>  | 8.41 (6.0-11.3)          | 6.5 (5.3-10.1)            |
| 6-month OS rate (95% CI), %        | 61.5 (50.2-71.0)         | 53.4 (44.4-61.6)          |
| 12-month OS rate (95% CI), %       | 39.4 (28.8-49.7)         | 36.9 (28.6-45.2)          |
| 24-month OS rate (95% CI), %       | 24.3 (15.6-34.0)         | 17.9 (11.8-25.0)          |

ORR, objective response rate; OS, overall survival;  
PFS, progression-free survival; PD-L1,  
programmed cell death 1 ligand 1.
