# Supplementary material for: Avelumab as second-line therapy for metastatic, platinum-treated urothelial carcinoma in the phase Ib JAVELIN Solid Tumor study: 2-year updated efficacy and safety analysis
Source: HighWire-hosted journal article supplement (doi:10.1136/jitc-2020-001246), 2020-10-01

### Additional file 6. Disease Control Rates (DCRs) in Selected High-Risk and Poor-Prognosis Subgroups

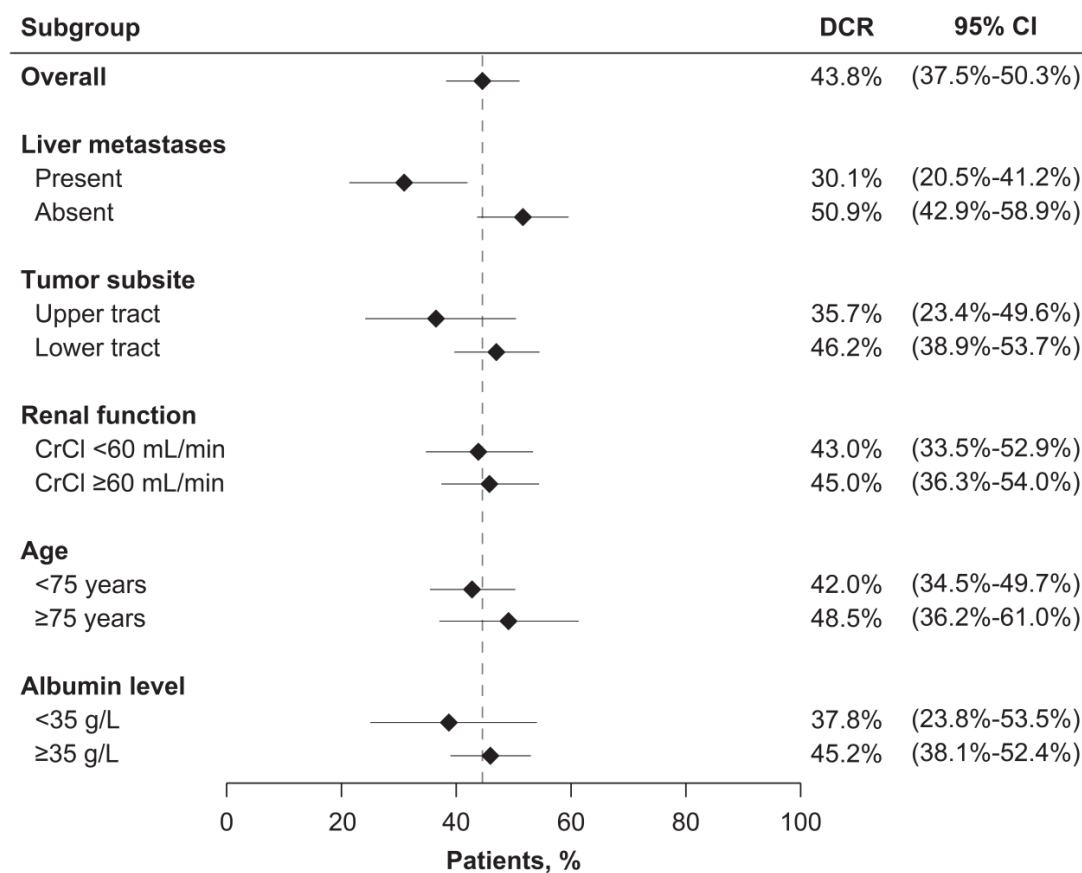

Supplement: jitc-2020-001246supp006_data_supplement.pdf [file jitc-2020-001246supp006_data_supplement.pdf]
