# Supplementary material for: Avelumab as second-line therapy for metastatic, platinum-treated urothelial carcinoma in the phase Ib JAVELIN Solid Tumor study: 2-year updated efficacy and safety analysis
Source: HighWire-hosted journal article supplement (doi:10.1136/jitc-2020-001246), 2020-10-01
Supplement: jitc-2020-001246supp007_data_supplement.pdf [file jitc-2020-001246supp007_data_supplement.pdf]

**Additional file 7. Treatment-Related Adverse Events (any grade in ≥10% or any grade ≥3) and Infusion-Related Reactions in All Patients (N=249)**

|                                                         | <b>Any Grade</b> | <b>Grade 1-2</b> | <b>Grade 3</b> | <b>Grade 4</b> | <b>Grade 5</b> |
|---------------------------------------------------------|------------------|------------------|----------------|----------------|----------------|
| Any treatment-related adverse event, n (%) <sup>a</sup> | 177 (71.1)       | 148 (59.4)       | 24 (9.6)       | 4 (1.6)        | 1 (0.4)        |
| Fatigue                                                 | 45 (18.1)        | 41 (16.5)        | 4 (1.6)        | 0              | 0              |
| Rash <sup>b</sup>                                       | 45 (18.1)        | 43 (17.3)        | 2 (0.8)        | 0              | 0              |
| Diarrhea                                                | 20 (8.0)         | 19 (7.6)         | 1 (0.4)        | 0              | 0              |
| Asthenia                                                | 15 (6.0)         | 13 (5.2)         | 2 (0.8)        | 0              | 0              |
| Decreased appetite                                      | 12 (4.8)         | 11 (4.4)         | 1 (0.4)        | 0              | 0              |
| Pneumonitis                                             | 9 (3.6)          | 6 (2.4)          | 2 (0.8)        | 0              | 1 (0.4)        |
| Elevated lipase level                                   | 4 (1.6)          | 0                | 2 (0.8)        | 2 (0.8)        | 0              |
| Elevated AST level                                      | 3 (1.2)          | 2 (0.8)          | 1 (0.4)        | 0              | 0              |
| Elevated ALP level                                      | 3 (1.2)          | 2 (0.8)          | 1 (0.4)        | 0              | 0              |
| Elevated blood creatine                                 | 3 (1.2)          | 2 (0.8)          | 1 (0.4)        | 0              | 0              |
| Dehydration                                             | 3 (1.2)          | 2 (0.8)          | 1 (0.4)        | 0              | 0              |
| Increased amylase                                       | 2 (0.8)          | 1 (0.4)          | 1 (0.4)        | 0              | 0              |
| Back pain                                               | 2 (0.8)          | 1 (0.4)          | 1 (0.4)        | 0              | 0              |
| Hypophosphatemia                                        | 2 (0.8)          | 1 (0.4)          | 1 (0.4)        | 0              | 0              |
| Acute kidney injury                                     | 1 (0.4)          | 0                | 1 (0.4)        | 0              | 0              |
| Adrenal insufficiency                                   | 1 (0.4)          | 0                | 1 (0.4)        | 0              | 0              |
| Autoimmune hepatitis                                    | 1 (0.4)          | 0                | 1 (0.4)        | 0              | 0              |
| Elevated blood CPK                                      | 1 (0.4)          | 0                | 0              | 1 (0.4)        | 0              |
| General physical health deterioration                   | 1 (0.4)          | 0                | 1 (0.4)        | 0              | 0              |
| Guillain-Barré syndrome                                 | 1 (0.4)          | 0                | 1 (0.4)        | 0              | 0              |
| Hepatitis                                               | 1 (0.4)          | 0                | 1 (0.4)        | 0              | 0              |
| Hyperkalemia                                            | 1 (0.4)          | 0                | 0              | 1 (0.4)        | 0              |
| Hypotremia                                              | 1 (0.4)          | 0                | 1 (0.4)        | 0              | 0              |
| Leukocytosis                                            | 1 (0.4)          | 0                | 1 (0.4)        | 0              | 0              |
| Osteonecrosis                                           | 1 (0.4)          | 0                | 1 (0.4)        | 0              | 0              |
| Psoriasis                                               | 1 (0.4)          | 0                | 1 (0.4)        | 0              | 0              |
| Infusion-related reaction <sup>c</sup>                  | 78 (31.3)        | 75 (30.1)        | 3 (1.2)        | 0              | 0              |

ALP, alkaline phosphatase; AST, aspartate aminotransferase; CPK, creatine phosphokinase.

<sup>a</sup> The incidence of treatment-related, infusion-related reaction based on the single Medical Dictionary for Regulatory Activities preferred term is not listed.

<sup>b</sup> Rash includes preferred terms dermatitis exfoliative, erythema, erythema multiforme, pemphigoid, pruritus, pruritus generalized, rash, rash erythematous, rash macular, rash maculopapular, rash papular, rash pruritic, and rash pustular.

<sup>c</sup> Composite term, which includes adverse events categorized as infusion-related reaction, drug hypersensitivity, or hypersensitivity reaction that occurred on the day of infusion or day after infusion, in addition to signs and symptoms of infusion-related reaction that occurred on the same day of infusion and resolved within 2 days

(including adverse events classified by investigators as related or unrelated to treatment).
