# Supplementary material for: Avelumab as second-line therapy for metastatic, platinum-treated urothelial carcinoma in the phase Ib JAVELIN Solid Tumor study: 2-year updated efficacy and safety analysis
Source: HighWire-hosted journal article supplement (doi:10.1136/jitc-2020-001246), 2020-10-01
Supplement: jitc-2020-001246supp008_data_supplement.pdf [file jitc-2020-001246supp008_data_supplement.pdf]

**Additional file 8. Immune-Related Adverse Events (N=249)**

| <b>Event, n (%)</b>                             | <b>Any Grade</b> | <b>Grade ≥3</b> |
|-------------------------------------------------|------------------|-----------------|
| Any event                                       | 51 (20.5)        | 12 (4.8)        |
| Immune-related rash                             | 28 (11.2)        | 1 (0.4)         |
| Rash                                            | 16 (6.4)         | 0               |
| Pruritus                                        | 8 (3.2)          | 0               |
| Rash maculopapular                              | 8 (3.2)          | 1 (0.4)         |
| Rash pruritic                                   | 4 (1.6)          | 0               |
| Erythema                                        | 1 (0.4)          | 0               |
| Erythema multiforme                             | 1 (0.4)          | 0               |
| Pruritus generalized                            | 1 (0.4)          | 0               |
| Rash erythematous                               | 1 (0.4)          | 0               |
| Immune-related thyroid disorders                | 13 (5.2)         | 0               |
| Hypothyroidism                                  | 10 (4.0)         | 0               |
| Hyperthyroidism                                 | 2 (0.8)          | 0               |
| Blood hypothyroid-stimulating hormone increased | 2 (0.8)          | 0               |
| Immune-related pneumonitis                      | 5 (3.2)          | 3 (1.2)         |
| Immune-related hepatitis                        | 4 (1.6)          | 3 (1.2)         |
| AST level increased                             | 2 (0.8)          | 1 (0.4)         |
| Hepatitis                                       | 1 (0.4)          | 1 (0.4)         |
| Autoimmune hepatitis                            | 1 (0.4)          | 1 (0.4)         |
| ALT level increased                             | 1 (0.4)          | 0               |
| Immune-related colitis                          | 2 (0.8)          | 1 (0.4)         |
| Diarrhea                                        | 2 (0.8)          | 1 (0.4)         |
| Enterocolitis                                   | 1 (0.4)          | 0               |
| Other immune-related adverse events             |                  |                 |
| Acute kidney injury                             | 1 (0.4)          | 1 (0.4)         |
| Adrenal insufficiency                           | 1 (0.4)          | 1 (0.4)         |
| Blood CPK increased                             | 1 (0.4)          | 1 (0.4)         |
| Guillain-Barré syndrome                         | 1 (0.4)          | 1 (0.4)         |
| Psoriasis                                       | 1 (0.4)          | 1 (0.4)         |
| Rheumatoid arthritis                            | 1 (0.4)          | 0               |
| Uveitis                                         | 1 (0.4)          | 0               |

ALT, alanine aminotransferase; AST, aspartate aminotransferase; CPK, creatine phosphokinase.
