# Supplementary figures and images for: Avelumab as second-line therapy for metastatic, platinum-treated urothelial carcinoma in the phase Ib JAVELIN Solid Tumor study: 2-year updated efficacy and safety analysis
Source: HighWire-hosted journal article supplement (doi:10.1136/jitc-2020-001246), 2020-10-01

**Additional file 1. JAVELIN Solid Tumor: Study Profile, Urothelial Carcinoma Cohorts**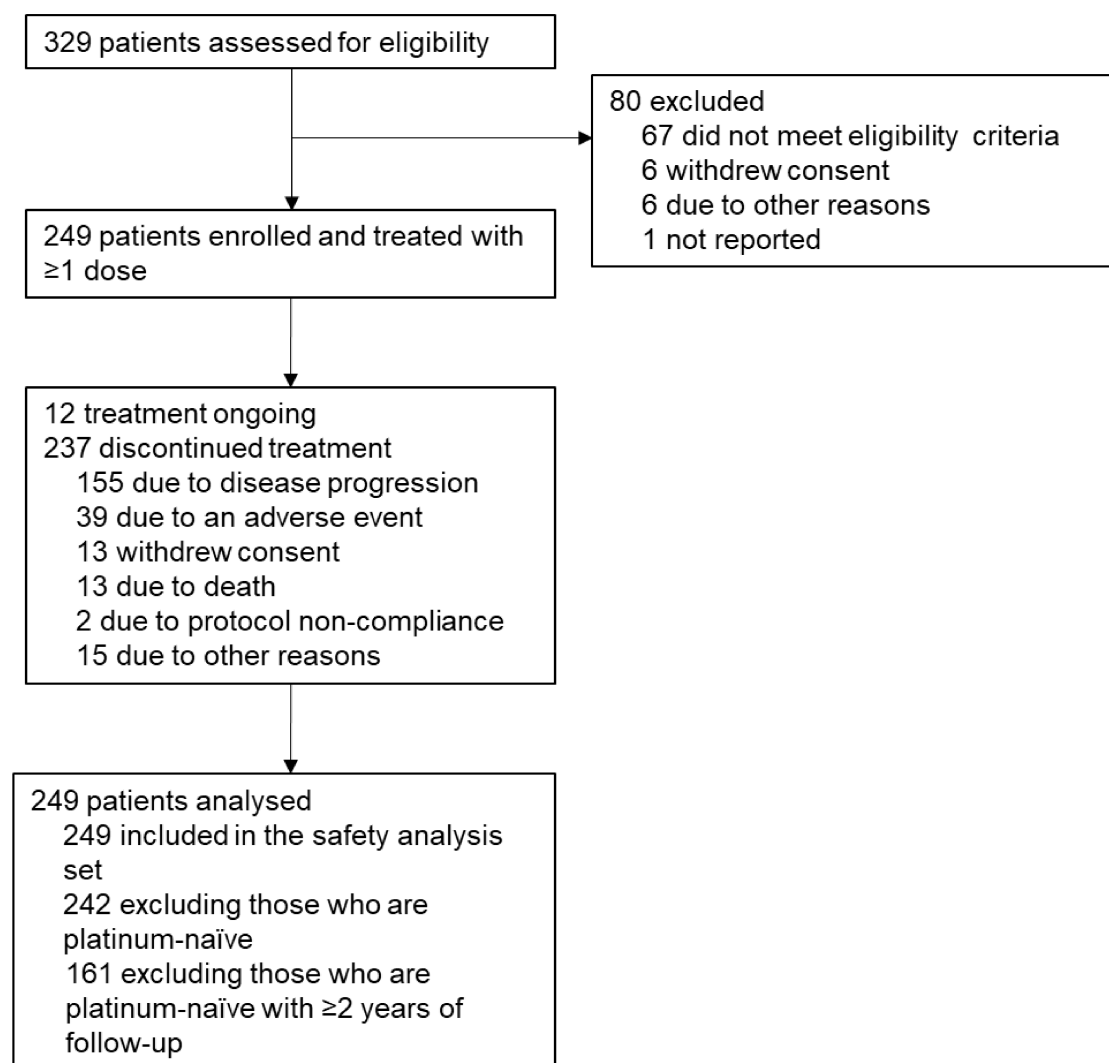

Supplement: jitc-2020-001246supp001_data_supplement.pdf [file jitc-2020-001246supp001_data_supplement.pdf]
